# Supplementary material
Source: MDPI journal article supplement (https://www.mdpi.com/1999-4915/7/12/6458)
Supplement: s1 [file s1]

# Supplementary Information

**Table S2.** Consensus sequence of the C-terminal part of HA-subtypes. Acylated cysteine residues are highlighted in yellow, a glycine in the TMD is highlighted on grey.

| Subtype | Transmembrane Domain |   |   |   |   |   |   |   |   |   |   |   | Cytoplasmic Tail |   |   |   |   |   |   |   |   |   |   |   |
|---------|----------------------|---|---|---|---|---|---|---|---|---|---|---|------------------|---|---|---|---|---|---|---|---|---|---|---|
| Group-1 | H1                   | V | V | S | L | G | A | I | S | F | W | M | C                | S | N | G | S | L | Q | C | R | I | C | I |
|         | H2                   | A | I | M | I | A | G | I | S | F | W | M | C                | S | N | G | S | L | Q | C | R | I | C | I |
|         | H5                   | A | I | M | V | A | G | L | S | L | W | M | C                | S | N | G | S | L | Q | C | R | I | C | I |
|         | H6                   | V | G | L | I | I | A | M | G | L | W | M | C                | S | N | G | S | M | Q | C | R | I | C | I |
|         | H8                   | A | I | L | I | A | G | G | L | I | L | G | M                | Q | N | G | S | C | R | C | M | F | C | I |
|         | H9                   | A | M | G | F | A | A | F | L | F | W | A | M                | S | N | G | S | C | R | C | N | I | C | I |
|         | H11                  | A | A | I | I | M | G | F | I | F | W | A | C                | S | N | G | S | C | R | C | T | I | C | I |
|         | H12                  | L | L | M | I | I | G | G | F | I | F | G | C                | Q | N | G | N | V | R | C | T | F | C | I |
|         | H13                  | V | G | L | I | L | A | F | I | M | W | A | C                | S | S | G | N | C | R | F | N | V | C | I |
|         | H16                  | V | G | L | I | L | A | F | I | M | W | A | C                | S | S | G | N | C | R | F | N | V | C | I |
| Group-2 | H3                   | C | V | V | L | L | G | F | I | M | W | A | C                | Q | K | G | N | I | R | C | N | I | C | I |
|         | H4                   | V | A | L | L | L | A | F | I | L | W | A | C                | Q | N | G | N | I | R | C | Q | I | C | I |
|         | H7                   | L | A | I | A | M | G | L | V | F | I | C | I                | K | N | G | N | M | R | C | T | I | C | I |
|         | H10                  | L | A | V | I | M | G | L | V | F | F | C | L                | K | N | G | N | M | R | C | T | I | C | I |
|         | H14                  | V | A | L | I | L | G | F | V | L | W | A | C                | Q | N | G | N | I | R | C | Q | I | C | I |
|         | H15                  | L | A | I | A | M | G | L | I | F | M | C | V                | K | N | G | N | L | R | C | T | I | C | I |
|         | Flu B                | T | L | M | I | A | I | F | I | V | Y | M | V                | S | R | D | N | V | S | C | S | I | C | L |
